# Supplementary material for: The Epidemiology and Economic Burden of Obesity and Related Cardiometabolic Disorders in the United Arab Emirates: A Systematic Review and Qualitative Synthesis
Source: J Obes. 2018 Dec 3;2018:2185942. doi: 10.1155/2018/2185942 (PMC6311818; doi:10.1155/2018/2185942)
Supplement: Supplementary Materials — Appendix A: search strategy followed and flow chart. Appendix B: quality assessment of the cost of illness for diabetes in the United Arab Emirates study. [file 2185942.f1.zip]

Archive with 2 entries (2 files):
- Appendix A- Search strategy and Flow Chart.docx
- Appendix B- Quality assessment of the COI study_JOBE_2499680.docx
